# Supplementary material for: Functional Status of Patients over 65 Years Old Intervened on for a Hip Fracture One Year after the Operation
Source: MDPI journal article supplement (doi:10.3390/healthcare11101520), 2023-05-22
Supplement: s1 [file s1]

**Supplementary material.**

**Figure S1.** Flow chart.

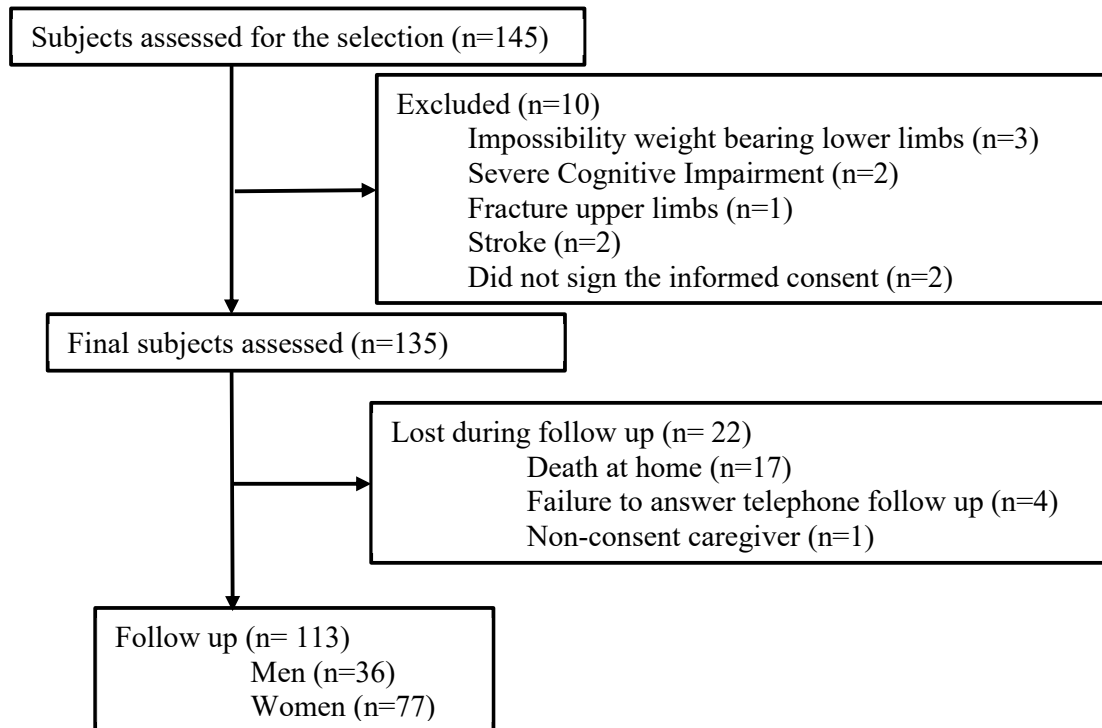

**Table S1.** Information on the total number of patients considered at admission.

|                                             | Sex                |                  | p-value | Total<br>(N = 135) |
|---------------------------------------------|--------------------|------------------|---------|--------------------|
|                                             | Female<br>(N = 97) | Male<br>(N = 38) |         |                    |
| Age, years                                  | 82.2 ± 7.4         | 80.2 ± 8.0       | 0.170   | 81.6 ± 7.6         |
| Body mass index, kg/m <sup>2</sup>          | 26.7 ± 4.5         | 27.0 ± 4.1       | 0.760   | 26.8 ± 4.4         |
| Type of fracture, n (%)                     |                    |                  | 0.878   |                    |
| Intracapsular                               | 40 (41)            | 17 (45)          |         | 57 (42)            |
| Subtrochanteric                             | 13 (13)            | 4 (10)           |         | 17 (13)            |
| Pertrochanteric                             | 44 (46)            | 17 (45)          |         | 61 (45)            |
| Osteosynthesis material, n(%)               |                    |                  | 0.381   |                    |
| Nail                                        | 61 (63)            | 21 (55)          |         | 82 (61)            |
| Partial prosthesis                          | 30 (31)            | 16 (42)          |         | 46 (34)            |
| Total prosthesis                            | 6 (6)              | 1 (3)            |         | 7 (5)              |
| Charlson index                              | 4.7 ± 1.5          | 4.9 ± 1.6        | 0.593   | 4.8 ± 1.5          |
| Delirium                                    | 10 (10)            | -                | 0.062   | 10 (7)             |
| Number of physiotherapy sessions            | 5.2 ± 3.1          | 6.0 ± 3.6        | 0.171   | 5.4 ± 3.3          |
| Days of hospital stay                       | 13.3 ± 7.1         | 15.8 ± 8.5       | 0.087   | 14.0 ± 7.6         |
| Patient location before, n (%)              |                    |                  | 0.269   |                    |
| Home                                        | 92 (95)            | 34 (90)          |         | 126 (93)           |
| Elderly residence                           | 5 (5)              | 4 (10)           |         | 9 (7)              |
| Patient location after, n (%)               |                    |                  | 0.827   |                    |
| Home                                        | 81 (84)            | 31 (82)          |         | 112 (84)           |
| Social health centre                        | 8 (8)              | 3 (8)            |         | 11 (8)             |
| Elderly residence                           | 7 (7)              | 4 (10)           |         | 11 (8)             |
| Functional tests                            |                    |                  |         |                    |
| Katz                                        |                    |                  |         |                    |
| Average ± s.d.                              | 4.4 ± 1.2          | 4.8 ± 0.7        | 0.015   | 4.5 ± 1.1          |
| Katz, n (%)                                 |                    |                  | 0.127   |                    |
| Severe disability (0-2)                     | 8 (8)              | 1 (3)            |         | 9 (7)              |
| Moderate disability (3-4)                   | 24 (25)            | 5 (13)           |         | 29 (21)            |
| Mild or no disability (5-6)                 | 65 (67)            | 32 (84)          |         | 97 (72)            |
| Lawton                                      |                    |                  |         |                    |
| Average ± s.d.                              | 4.4 ± 2.7          | 5.7 ± 2.5        | 0.012   | 4.8 ± 2.7          |
| Median (P <sub>25</sub> ; P <sub>75</sub> ) | 5 (2; 7)           | 6.4 (4.4; 8)     | 0.008   | 5 (2; 8)           |
| Lawton, n (%)                               |                    |                  | 0.227   |                    |
| Severe dependence (0-2)                     | 29 (30)            | 6 (16)           |         | 35 (26)            |
| Mild dependence (3-5)                       | 28 (29)            | 12 (32)          |         | 40 (30)            |
| Independence (6-8)                          | 40 (41)            | 20 (53)          |         | 60 (44)            |
| FAC                                         |                    |                  |         |                    |
| Average ± s.d.                              | 4.2 ± 0.9          | 4.4 ± 0.6        | 0.086   | 4.2 ± 0.8          |
| FAC, n (%)                                  |                    |                  | 0.210   |                    |
| Walking with aid (0-1)                      | 2 (2)              | -                |         | 2 (1)              |
| Supervised walking (2-3)                    | 14 (14)            | 2 (5)            |         | 16 (12)            |
| Independent walking (4-5)                   | 81 (84)            | 36 (95)          |         | 117 (87)           |
| <b>Sarcopenia</b>                           |                    |                  |         |                    |
| Sarc-F                                      |                    |                  |         |                    |
| Average ± s.d.                              | 3.3 ± 2.5          | 2.0 ± 1.9        | 0.004   | 2.9 ± 2.4          |
| Median (P <sub>25</sub> ; P <sub>75</sub> ) | 3 (1; 5)           | 1 (0; 3)         | 0.005   | 3 (1; 4)           |
| Sarc-F ≥ 4, n (%)                           | 40 (41)            | 8 (21)           | 0.030   | 48 (36)            |
| <b>Cognitive Impairment</b>                 |                    |                  |         |                    |

|                                             |               |               |       |               |
|---------------------------------------------|---------------|---------------|-------|---------------|
| Pfeiffer                                    |               |               |       |               |
| Average $\pm$ s.d.                          | 4.0 $\pm$ 2.6 | 3.6 $\pm$ 2.4 | 0.428 | 3.9 $\pm$ 2.5 |
| Median (P <sub>25</sub> ; P <sub>75</sub> ) | 4 (2; 6)      | 4 (1; 6)      | 0.527 | 4 (2; 6)      |
| Pfeiffer, n (%)                             |               |               | 0.451 |               |
| No impairment (0-2)                         | 30 (31)       | 15 (39)       |       | 45 (33)       |
| Mild impairment (3-4)                       | 25 (26)       | 8 (21)        |       | 33 (24)       |
| Moderate impairment (5-7)                   | 30 (31)       | 14 (37)       |       | 44 (33)       |
| Severe impairment (8-10)                    | 12 (12)       | 1 (3)         |       | 13 (10)       |

s.d. = standard deviation. P<sub>25</sub>; P<sub>75</sub> = Percentile 25 and 75, respectively. n=number of cases. FAC=Functional Ambulation Classification. Katz index=basic daily life activity. Lawton and Brody scale=instrumental activity daily life. Pfeiffer = Quantitative cognitive function.

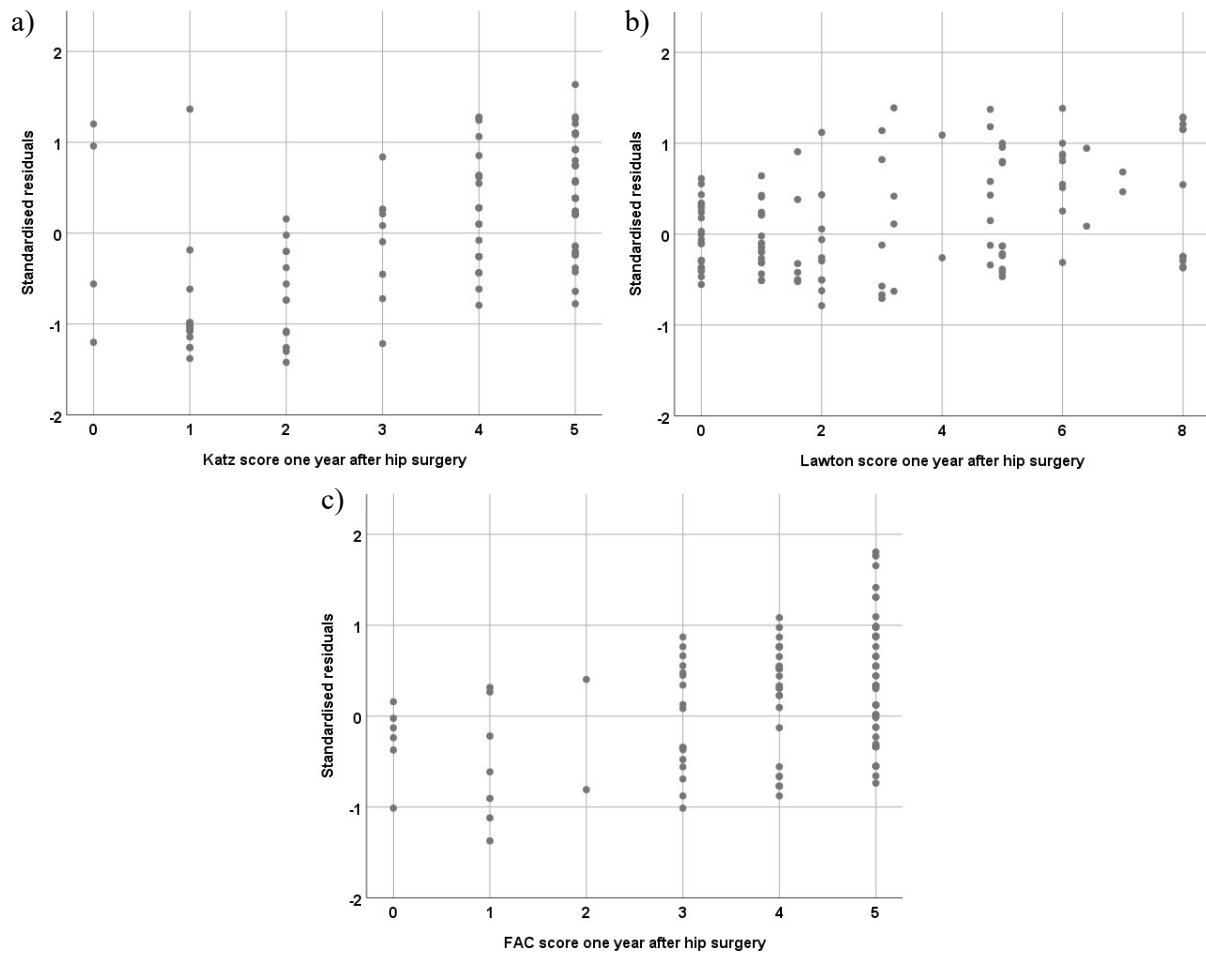

**Figure S2.** Standardized residuals of the models in Table 2 versus the values observed one year after the hip operation of the scores of (a) Katz, (b) Lawton and Brody, and (c) FAC.
